# Supplementary material for: Micro/nanostructured α-Fe2O3 spheres: synthesis, characterization, and structurally enhanced visible-light photocatalytic activity
Source: Royal Society of Chemistry journal article supplement (doi:10.1039/c2jm31586f), 2012-01-01
Supplement: c2jm31586f.pdf [file c2jm31586f.pdf]

## Supporting information

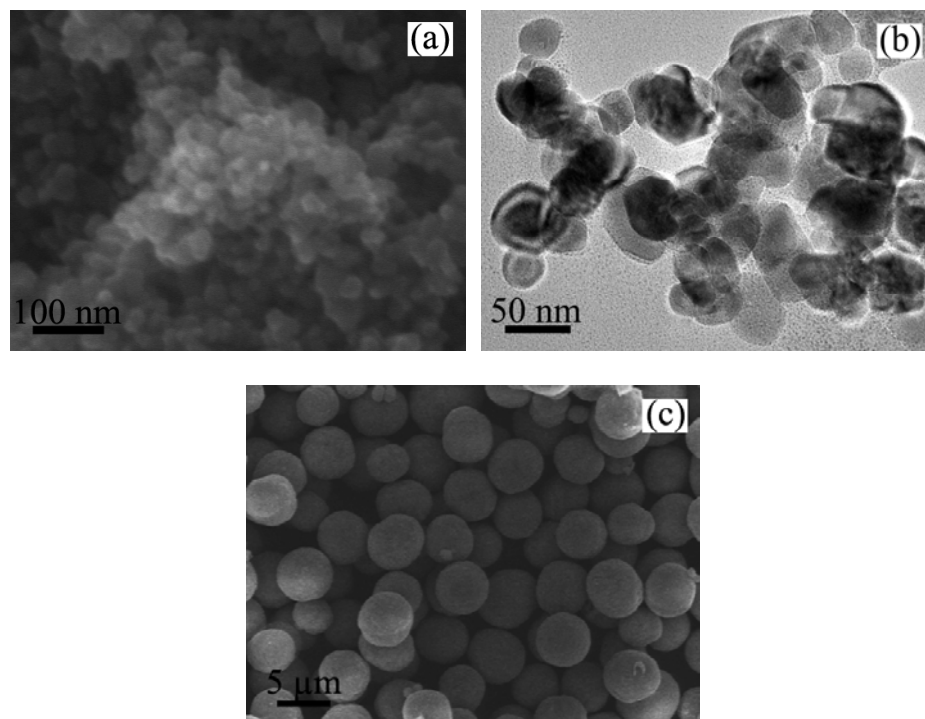

Fig. S1 (a) SEM and (b) TEM image of nanosized  $\alpha$ -Fe<sub>2</sub>O<sub>3</sub>, (c) SEM image of micron-sized  $\alpha$ -Fe<sub>2</sub>O<sub>3</sub>.

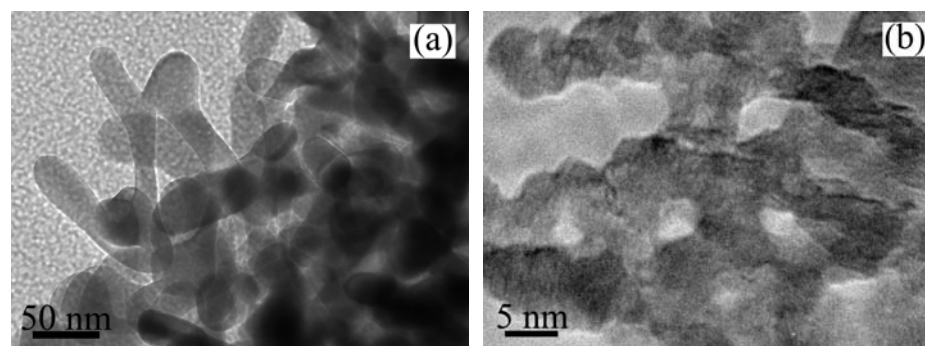

Fig. S2 (a) TEM image of MNFSSs' surface, (b) pore distribution (size about 2 nm) in MNFSSs.

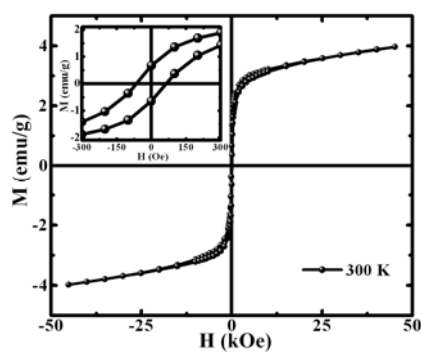

Fig. S3 Hysteresis loop of MNFSSs measured at 300 K. Inset: The enlarged magnetization curve between -300 and 300 Oe.
